# Supplementary material
Source: Springer Nature journal article supplement (https://www.springermedizin.de/resource/supplementary/12889_2012_5896_MOESM2_ESM.pdf/9496320)
Supplement: MOESM2 [file 9496320]

| Photo                                                                              | Name<br>(Capacity)                                              | Description of design                                                                                                                                                                                                                                                                                                                                                                                                                        |
|------------------------------------------------------------------------------------|-----------------------------------------------------------------|----------------------------------------------------------------------------------------------------------------------------------------------------------------------------------------------------------------------------------------------------------------------------------------------------------------------------------------------------------------------------------------------------------------------------------------------|
|     | <p>Drum<br/>(30 L)</p>                                          | <p>The drum is a plastic barrel with a turn-handle water-dispensing spout. A plastic soap container encases a standard sized bar of soap (0.28 USD). This technology was selected because running water from the tap allows for washing of both hands and approximates the functionality of a sink with running water. This design did not have a waste water receptacle.</p>                                                                |
|    | <p>Bodna<br/>(2.25 L)</p>                                       | <p>A <i>bodna</i> is a round-bottomed, wide mouthed vessel with a spout, commonly used in Bangladesh for cleansing after defecation. Similar vessels are referred to as <i>lota</i> in Pakistan and India. A plastic soap cup covered the mouth of the <i>bodna</i> and held a standard sized bar of soap. We tested the <i>bodna</i> because it is a commonly available, low-cost household item that is familiar to most Bangladeshis.</p> |
|    | <p>Bottle<br/>with valve<br/>(2 L)</p>                          | <p>The bottles used for this technology are reclaimed 2 litre plastic soda bottles with a plastic and rubber valve cap. Water is dispensed from the inverted bottle when the rubber valve is pushed up. The bottle was installed in a metal holster which also held a standard sized bar of soap. The purpose of this design was to use locally available materials for compact, urban handwashing stations.</p>                             |
|   | <p>Soapy<br/>water<br/>bottle<br/>(1.5 L)</p>                   | <p>Consists of reclaimed 1.5-liter water bottles. In the top of each bottle's original cap a small hole is drilled to dispense the liquid. Single-load packets of detergent powder ( ~0.03 USD) were mixed with water to make soapy water for handwashing. This combination was tested because it provides soap and water in a single package, produced with low-cost local materials.</p>                                                   |
|  | <p>Soapy<br/>water<br/>bottle<br/>with<br/>pump<br/>(1.5 L)</p> | <p>Modification of soapy water bottle (Design #4 above). A translucent 1.5 litre bottle of more durable plastic replaced the bottle in Design #4. Instead of a twist-on cap with a hole, a plastic pump topped the bottle. The same, single load detergent packets were used to make soapy water.</p>                                                                                                                                        |
|  | <p>40L<br/>Bucket (40<br/>L)</p>                                | <p>Designs #6 and #7 are similar. Developed in response to the success of the drum (Design #1). Consists of a plastic bucket with a lid, a plastic turn-handle spout, a plastic stool for the bucket to stand on, and a plastic receptacle for used water. The soapy water bottle (Design #4) is included.</p>                                                                                                                               |
|  | <p>Kitchen<br/>bucket<br/>(15 L)</p>                            | <p>This design is a smaller version of design #6 to fit in food preparation and other areas which lack space for a 40 L handwashing station. The soapy water bottle (Design #4) is included.</p>                                                                                                                                                                                                                                             |
